# Supplementary material for: Synergistic Valorization: Generating Bioelectricity and High- Protein Animal Feed From Fermented Crop Residues
Source: Research Square preprint supplement (doi:10.21203/rs.3.rs-7421222/v1), 2025-10-15
Supplement: Supplementary file 1 [file 806993ae17545b7344b3e947.docx]

**Genetic sequencing of bacteria and yeasts isolated from agrowastes used for the controlled Microbial fuel cell (MFC)**

ACAACACCTAAATGTGGAATATAGCATATAGTCGACAAGAGAAATCTACGAAAAACMAAC

MAAACTTTCMACAACGGATCTCTTGGTTCTCSCATCSATGAARARCGCAGCGAAATGSGA

TACCTARTGKGAATTGCAGCCMTCGTGAATCATCSAGTTCTTGAACGCACATTGSGCCCC

TCSGCATTCCGGGGGGSATGCCTGKTTGARCGKCGTTTCCMTCTTGCGCGTGCGCARART

TGGGGGARCGGARCGGACSACGTGKAAAGARCGTCGGARCTGCSACTCSCCTGAAAGGGA

RCGAARCTGGCCSARCGAACTARACTTTTTTTCMGGGACSCTTGGCGGCCGARARCGART

GKTGCGARACAACAAAAAGCTCSACCTCMAATCAGGKARGAATACCCGCTGAACTTAAG

***Pichia* *kudriavzevii*** MN007220.1

CAWTTTGTGAMCGTACTACGAACAAACAAAAAAAATTATAKYCAAAAAAAAATTAAAC AACTTTTCAACTGGGGATCCCTGGGTTCCSWTCCCKTAAAAAAACCCAGCAAACCCCYA TTTTTCTGGGGATTTGCAAAAGGGACCCATCATTTTTAGCCCCCCTTTTGCACTTTGGGG AACCCCCCAARKTATCCTGGTTRGAGGGTTGTTTCCCTTTGGGATGGGCTTTTCCTTTCC

AAAAAAACRGAYCCAATATCSTTGAAATTTCCTTTTTTTTAACCCTCAAATCARRRAGGA TTCCCCGTTAACTTWASCCATATCAATARGCGGGGAA

***Geotrichum* *candidum*** MK943778.1

AGGTTACCTCACCGACTTCGGGTGTTACAAACTCTCGTGGTGTGACGGGCGGTGTGTACA

AGGCCCGGGAACGTATTCACCGCGGCATGCTGATCCGCGATTACTAGCGATTCCAGCTTC

ACGCAGTCGAGTTGCAGACTGCGATCCGAACTGAGAACAGATTTGTGGGATTGGCTTAAC

CTCGCGGTTTCGCTGCCCTTTGTTCTGTCCATTGTAGCACGTGTGTAGCCCAGGTCATAA

GGGGCATGATGATTTGACGTCATCCCCACCTTCCTCCGGTTTGTCACCGGCAGTCACCTT

AGAGTGCCCAACTGAATGCTGGCAACTAAGATCAAGGGTTGCGCTCGTTGCGGGACTTAA

CCCAACATCTCACGACACGAGCTGACGACAACCATGCACCACCTGTCACTCTGCCCCCGA

AGGGGACGTCCTATCTCTAGGATTGTCAGAGGATGTCAAGACCTGGTAAGGTTCTTCGCG

TTGCTTCGAATTAAACCACATGCTCCACCGCTTGTGCGGGCCCCCGTCAATTCCTTTGAG

TTTCAGTCTTGCGACCGTACTCCCCAGGCGGAGTGCTTAATGCGTTAGCTGCAGCACTAA

GGGGCGGAAACCCCCTAACACTTAGCACTCATCGTTTACGGCGTGGACTACCAGGGTATC

TAATCCTGTTCGCTCCCCACGCTTTCGCTCCTCAGCGTCAGTTACAGACCAGAGAGTCGC

CTTCGCCACTGGTGTTCCTCCACATCTCTACGCATTTCACCGCTACACGTGGAATTCCAC

TCTCCTCTTCTGCACTCAAGTTCCCCAGTTTCCAATGACCCTCCCCGGTTGAGCCGGGGG

CTTTCACATCAGACTTAA

***Bacillus* *subtilis*** NR102783.2

TTACCTCAMCGACTTCGGGTGTTACAAACTCTCGTGGTGTGACGGGCGGTGTGTACAAGG

CCCGGGAACGTATTCACCGCGGCATGCTGATCCGCGATTACTAGCGATTCCGGCTTCATG

TAGGCGAGTTGCAGCCTACAATCCGAACTGAGAACGACTTTATCGGATTAGCTCCCTCTC

GCGAGTTGGCAACCGTTTGTATCGTCCATTGTAGCACGTGTGTAGCCCAGGTCATAAGGG

GCATGATGATTTGACGTCATCCCCACCTTCCTCCGGTTTGTCACCGGCAGTCACCTTAGA

GTGCCCAACTAAATGATGGCAACTAAGATCAAGGGTTGCGCTCGTTGCGGGACTTAACCC

AACATCTCACGACACGAGCTGACGACAACCATGCACCACCTGTCACCGTTGCCCCCGAAG

GGGAAACTATATCTCTACAGTGGTCAACGGGATGTCAAGACCTGGTAAGGTTCTTCGCGT

TGCTTCGAATTAAACCACATGCTCCACCGCTTGTGCGGGCCCCCGTCAATTCCTTTGAGT

TTCAGTCTTGCGACCGTACTCCCCAGGCGGAGTGCTTAATGCGTTAGCTGCAGCACTAAG

GGGCGGAAACCCCCTAACACTTAGCACTCATCGTTTACGGCGTGGACTACCAGGGTATCT

AATCCTGTTTGCTCCCCACGCTTTCGCGCCTCAGCGTCAGTTACAGACCAGAAAGTCGCC

TTCGCCACTGGTGTTCCTCCAAATCTCTACGCATTTCACCGCTACACTTGGAATTCCACT

TTCCTCTTCTGCACTCAAGTCCCCCAGTTTCCAATGACCCTCCACGGGTTGAGCCGTGGG

CTTTCACATCAGACTTAAA

***Lysinibacillus* *fusiformis*** KP419973.1


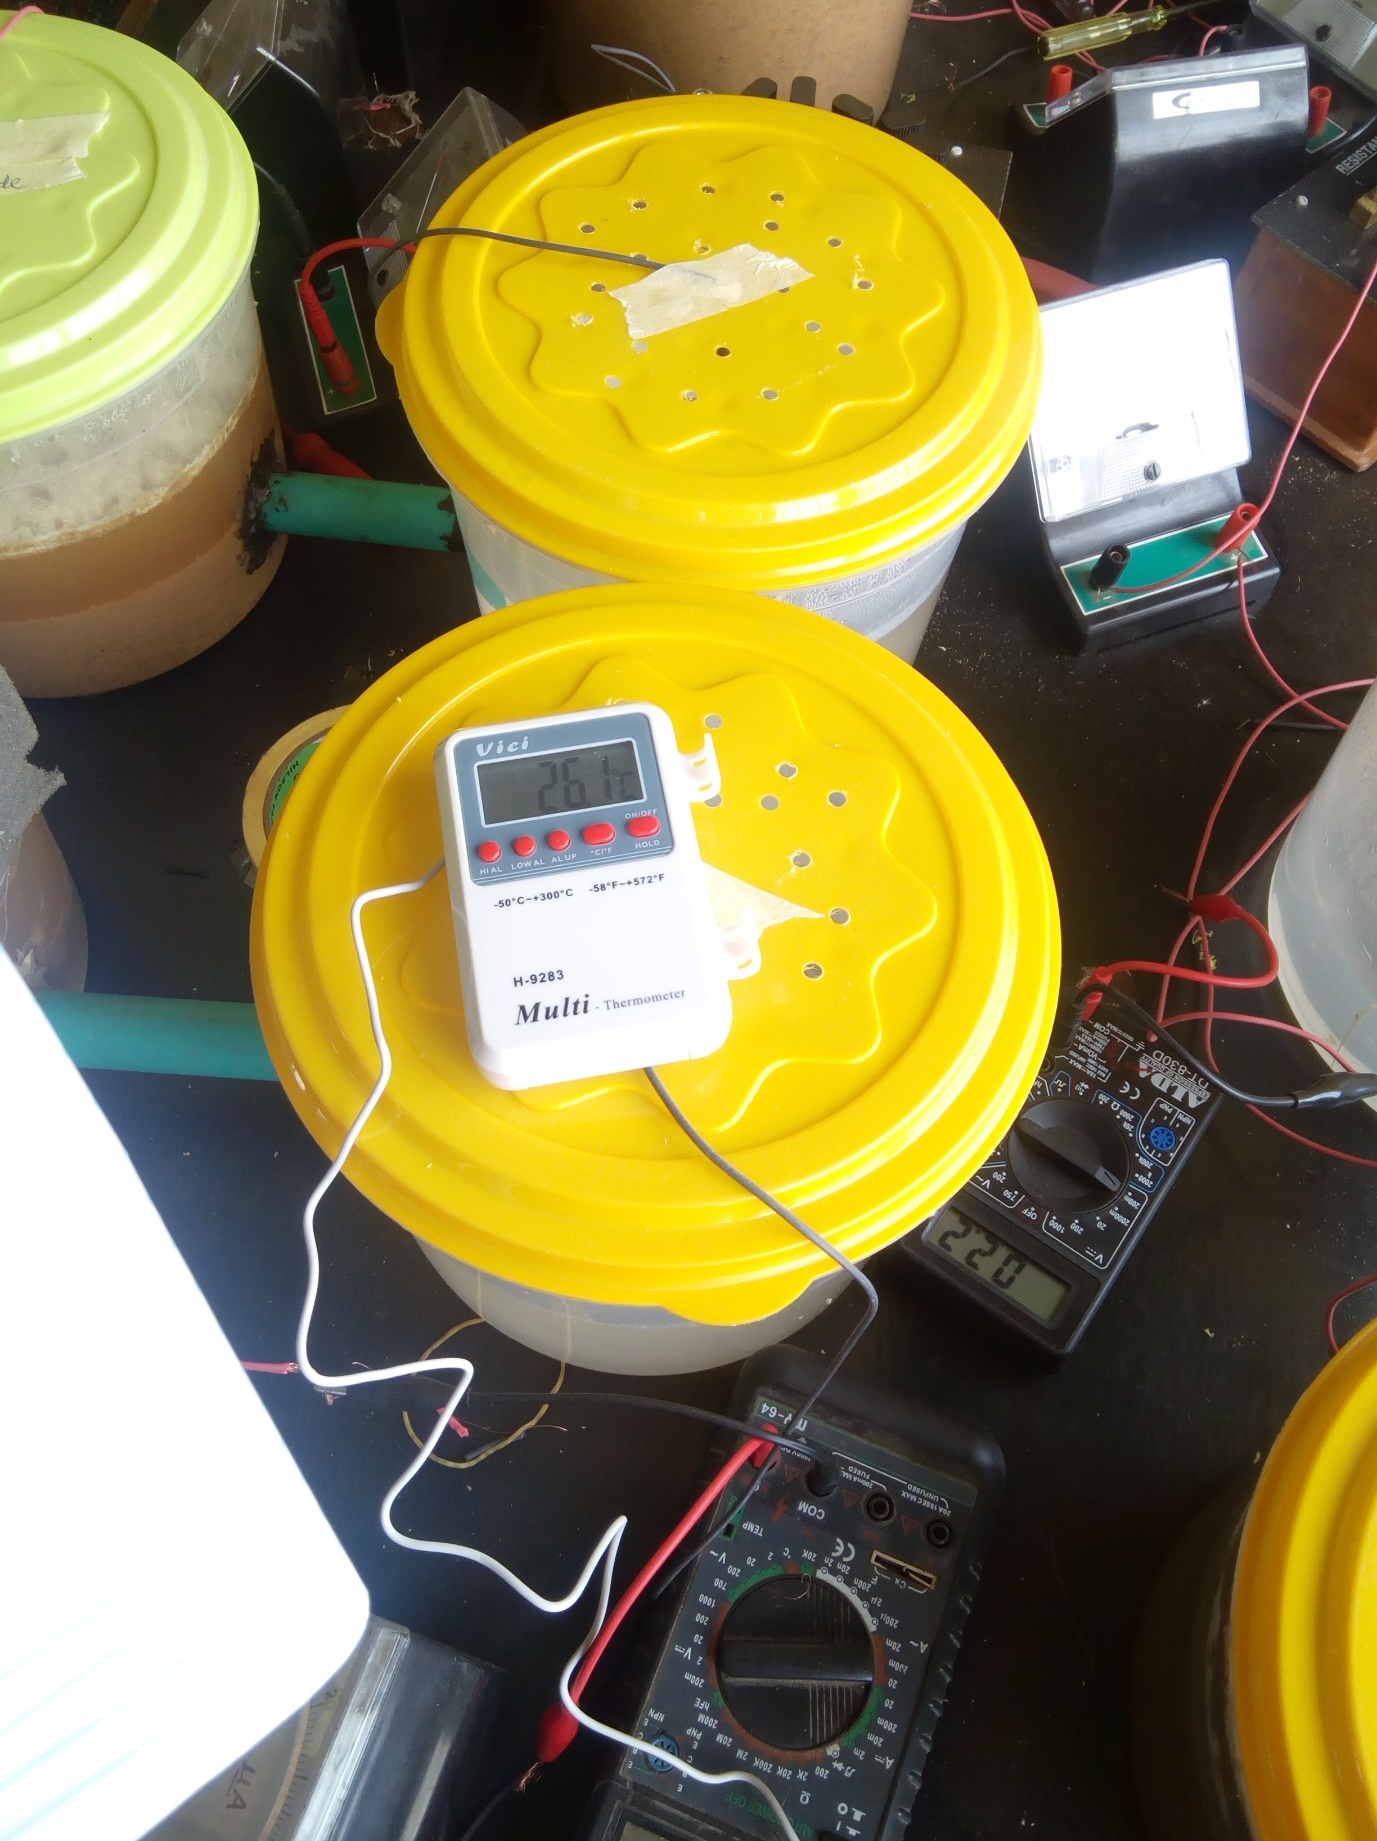


Microbial fuel cell set up inoculated with substrates

**
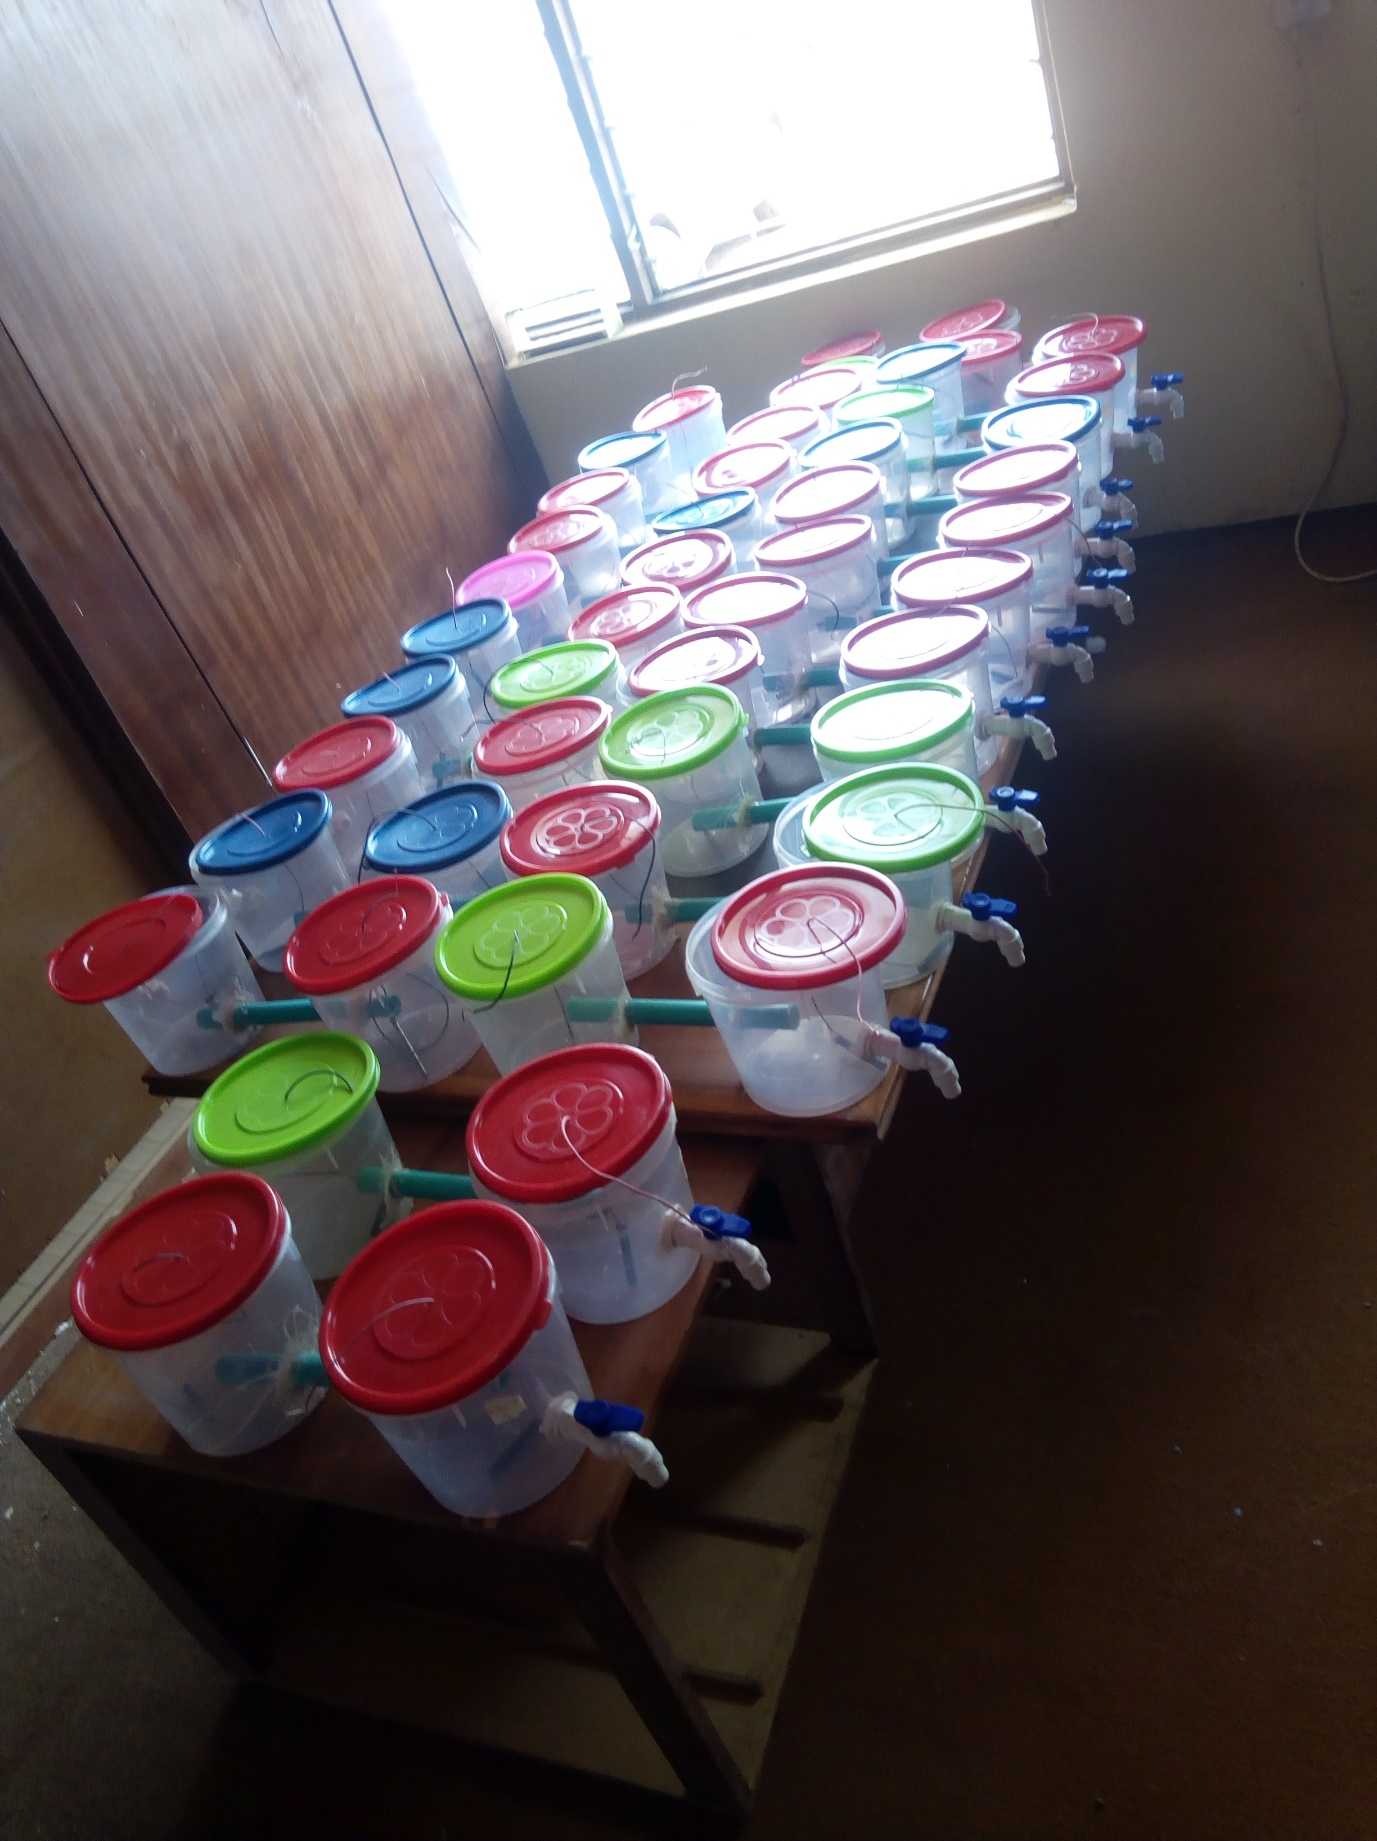
**

Completely constructed controlled microbial fuel cell

**
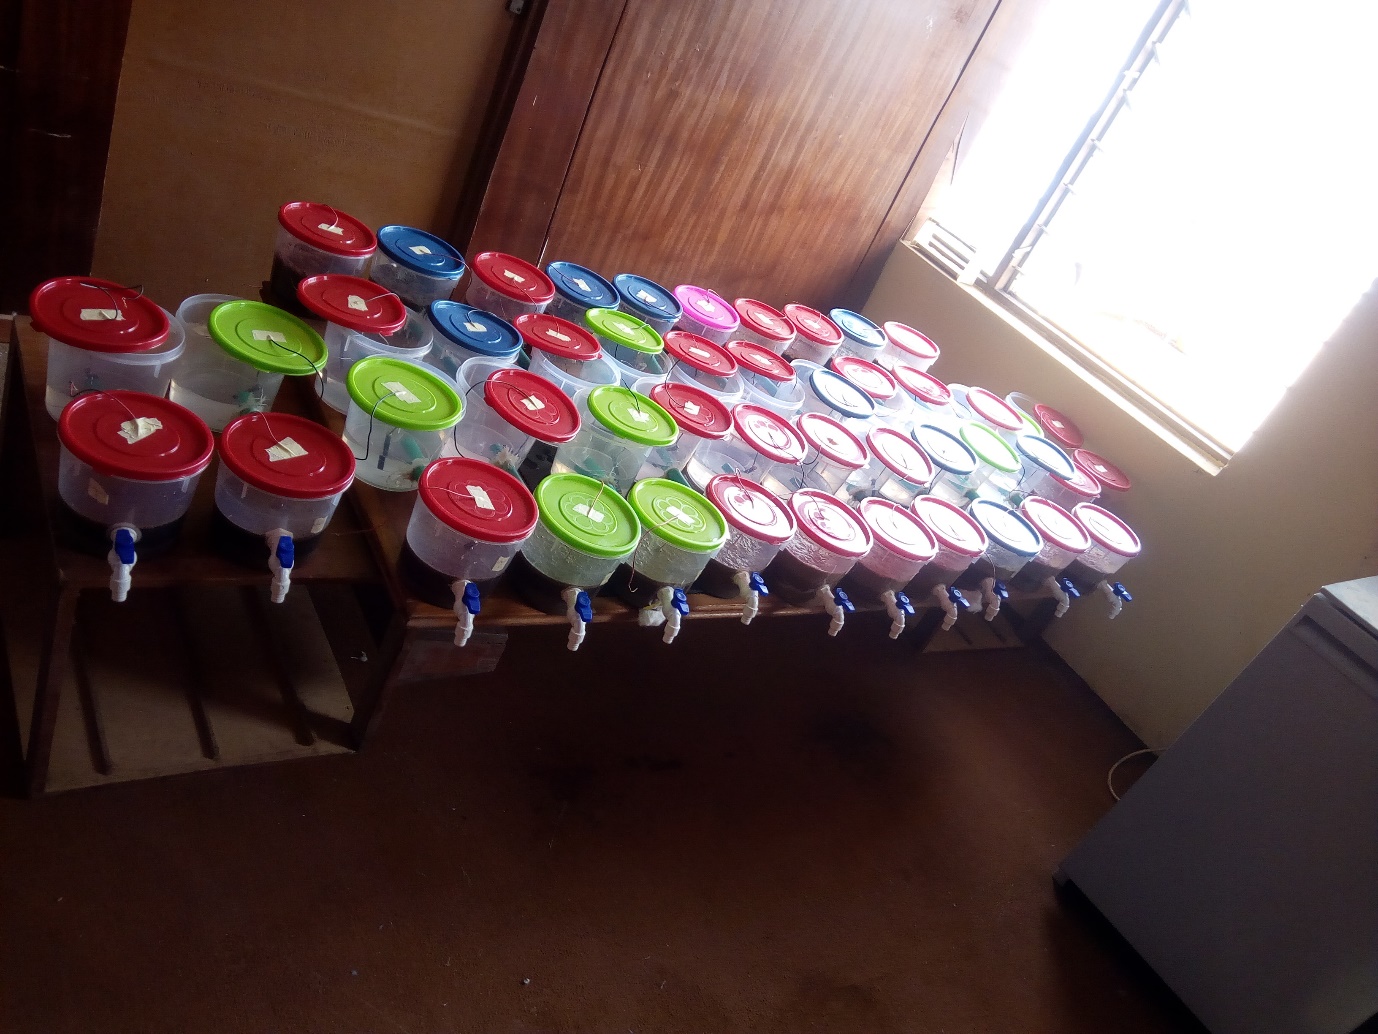
**

Controlled microbial fuel cell set up inoculated with substrates and organisms

**
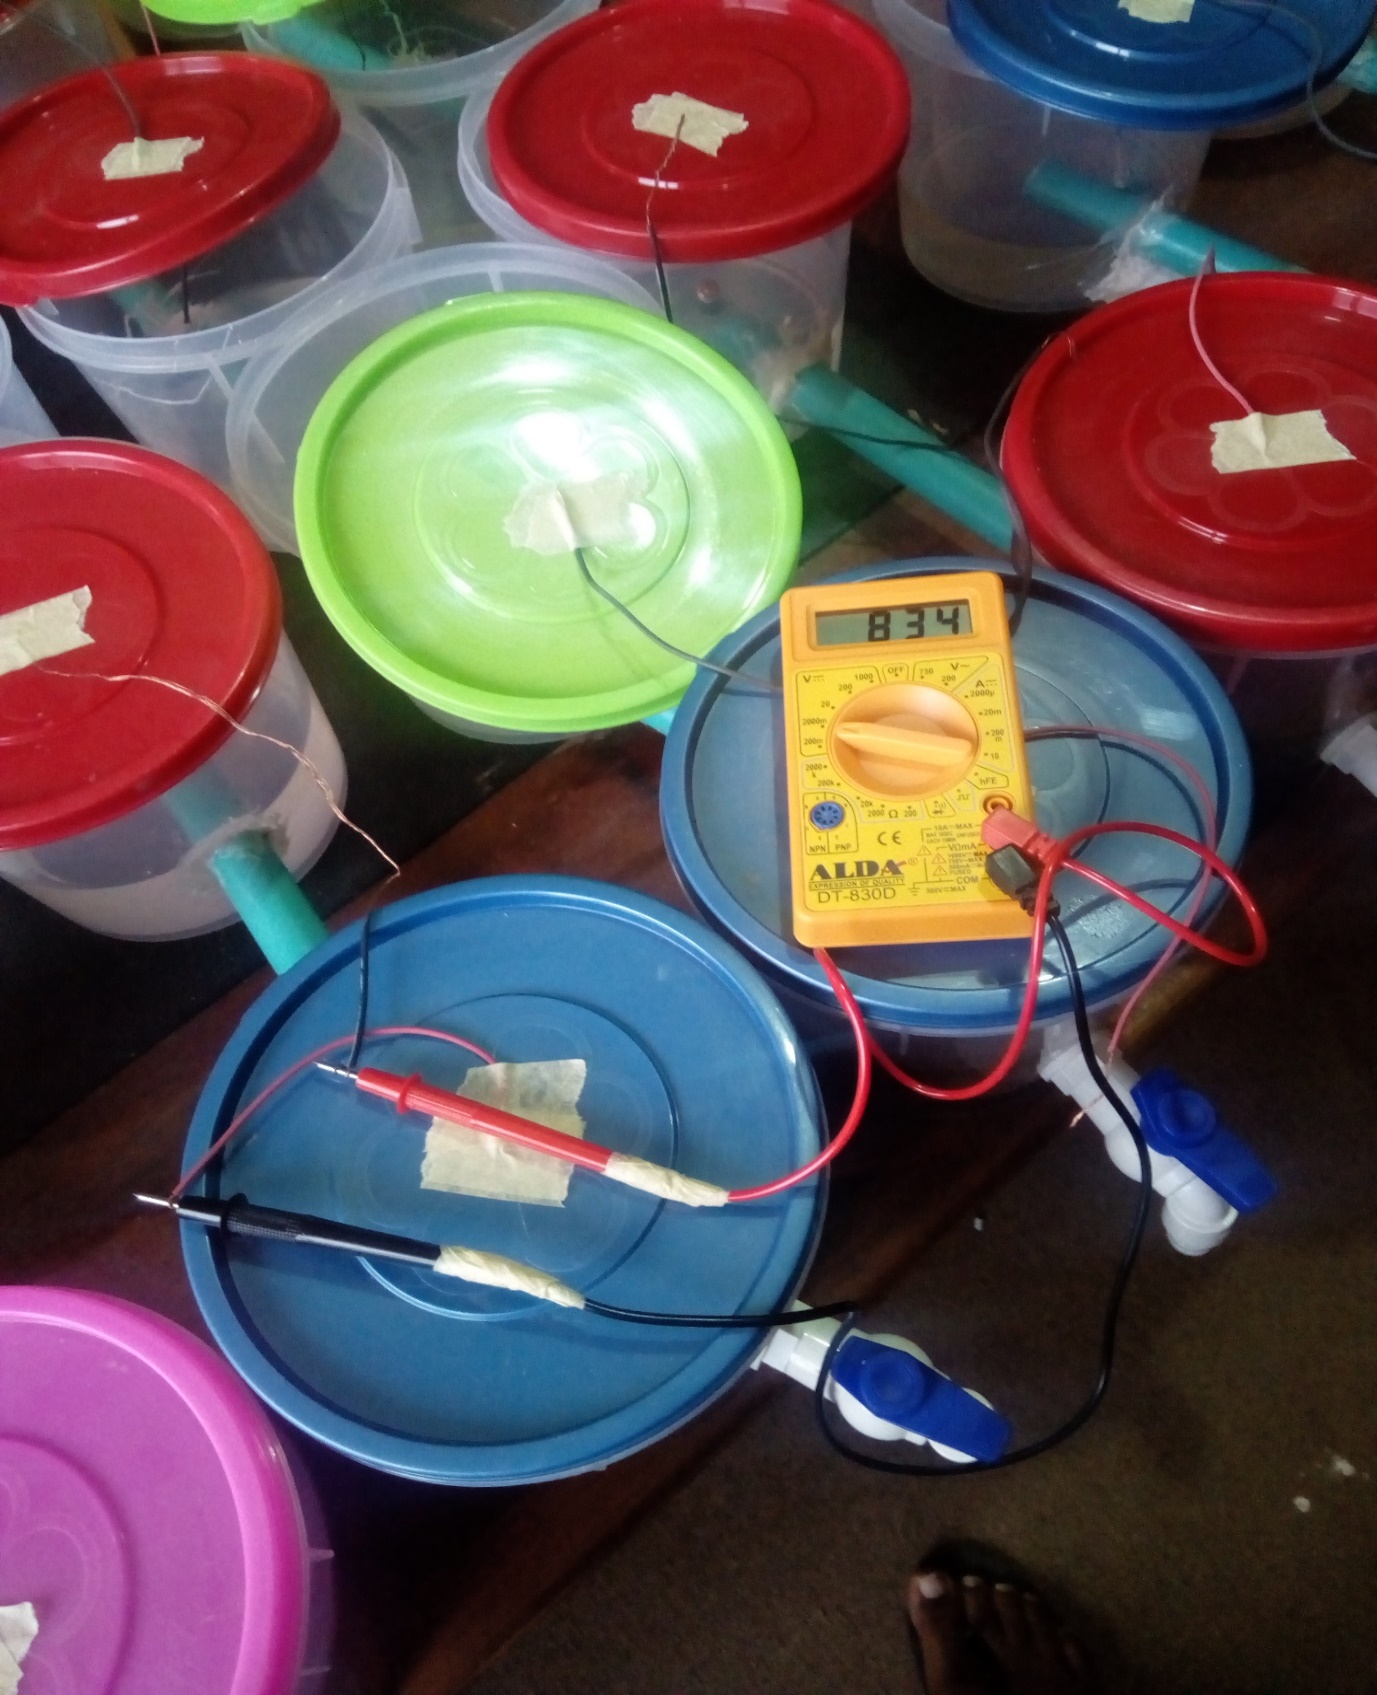
**

Voltage reading

**Table 5: Proximate content (%) of substrates (agro-wastes) before and after fermentation**

**The data are presented as the means ± S.E.ss (n=3). Values with the same superscript letter(s) in the same column are not significantly different (P<0.05).**

| AG | Moisture | | Ash | | Crude protein | | Crude fat | | Crude fibre | | Carbohydrate | |
| --- | --- | --- | --- | --- | --- | --- | --- | --- | --- | --- | --- | --- |
| raw | fermented | raw | fermented | raw | fermented | raw | fermented | raw | fermented | raw | fermented |
| A | 1.24±0.06b | 19.99±0.31a | 1.26±0.04a | 0.49±0.02a | 6.82±0.18c | 14.10±0.13d | 0.19±0.01b | 1.28±0.03a | 12.16±0.14b | 8.17±0.05c | 79.38±0.62a | 57.26±0.73c |
| B | 3.03±0.07c | 35.85±0.55b | 1.59±0.01b | 0.87±0.04c | 1.49±0.11a | 6.84±0.37b | 0.04±0.01a | 2.01±0.09c | 10.63±0.57b | 6.59±0.53b | 84.49±0.50b | 50.22±0.78b |
| C | 1.34±0.06b | 38.77±0.53c | 1.79±0.01c | 0.91±0.01c | 5.87±0.14b | 10.05±0.15c | 0.46±0.05c | 1.08±0.01a | 7.09±0.03a | 4.99±0.23a | 84.37±0.63b | 46.08±0.92a |
| D | 0.71±0.09a | 18.71±0.61a | 1.86±0.04c | 0.68±0.04b | 1.96±0.03a | 2.86±0.34a | 1.87±0.05d | 1.30±0.02b | 16.74±0.56c | 10.25±0.07d | 78.81±1.18a | 68.54±1.25d |

**Key:** A= potato peels, B= sugarcane shaft, C= wheat shaft, D= maize husk, AG-Agrowaste

| AG | K | | Na | | Zn | | Pb | | Fe | | Ca | |
| --- | --- | --- | --- | --- | --- | --- | --- | --- | --- | --- | --- | --- |
| raw | fermented | raw | fermented | raw | fermented | Raw | fermented | raw | Fermented | raw | fermented |
| A | 166.00±3.00a | 285.50±4.50a | 24.50±1.50a | 13.01±0.99a | 1.29±0.03a | 0.41±0.09b | 0.01±0.00a | 0.00±0.00 | 1.07±0.03a | 2.42±0.08a | 52.55±0.45c | 34.00±1.00a |
| B | 203.50±1.50b | 321.00±2.00b | 46.50±1.50d | 63.04±0.96c | 2.28±0.07b | 1.04±0.03c | 0.00±0.00a | 0.00±0.00 | 3.08±0.03c | 6.40±0.02c | 41.70±0.30b | 83.62±1.00d |
| C | 373.50±2.50c | 494.00±2.00d | 33.53±1.47b | 50.00±2.00b | 1.59±0.05b | 0.05±0.01a | 0.00±0.00a | 0.00±0.00 | 3.25±0.05c | 9.57±0.04d | 75.05±0.95d | 54.45±0.55c |
| D | 210.50±1.50b | 346.00±2.00c | 40.04±1.96c | 17.02±0.98a | 2.07±0.06c | 4.10±0.02d | 0.04±0.00b | 0.00±0.00 | 1.71±0.07b | 5.86±0.06b | 30.06±0.95a | 43.05±0.95b |

**Mineral content (mg/100 g) of substrates (agrowastes) before and after fermentation**

**The data are presented as the means ± S.E.ss (n=3). Values with the same superscript letter(s) in the same column are not significantly different (P<0.05).**

**Keywords:** A= potato peels, B= sugarcane shaft, C= wheat shaft, D= maize husk, AG-agrowaste

**Vitamin content (mg/g) of substrates (agrowastes) before and after fermentation**

| Samples | Vitamin C | | Vitamin B1 | | Vitamin B2 | | Vitamin D | | Vitamin A | |
| --- | --- | --- | --- | --- | --- | --- | --- | --- | --- | --- |
| raw | fermented | Raw | fermented | raw | fermented | raw | fermented | raw | fermented |
| A | 8.58±0.47c | 26.93±0.19d | 1.04±0.00b | 1.71±0.00d | 0.61±0.00d | 1.17±0.00d | 0.65±0.00c | 1.85±0.01c | 235.02±27.01a | 828.63±3.41d |
| B | 5.19±0.23a | 18.58±0.50a | 0.33±0.12a | 0.46±0.00a | 0.05±0.00a | 0.29±0.00a | 0.75±0.01d | 1.23±0.01a | 228.63±2.46a | 377.05±25.66a |
| C | 4.12±0.31a | 22.92±0.19c | 0.51±0.00a | 1.05±0.00c | 0.33±0.00c | 0.60±0.00b | 0.58±0.01b | 1.43±0.01b | 280.87±25.96a | 600.58±28.14c |
| D | 6.82±0.19b | 19.83±0.34b | 0.35±0.00a | 0.86±0.00b | 0.19±0.00b | 0.65±0.00c | 0.06±0.00a | 1.25±0.01a | 375.61±21.47a | 513.52±4.46b |

**The data are presented as the means ± S.E.ss (n=3). Values with the same superscript letter(s) in the same column are not significantly different (P<0.05).**

**Keywords:** A= potato peels, B= sugarcane shaft, C= wheat shaft, D= maize husk, Vit. = vitamin

**Ethanol (%) and organic acid (mg/L) contents of the substrates (agrows) before and after fermentation**

| Samples | Ethanol | | Formic acid | | Malic acids | | Citric acids | | Acetic acids | | Lactic acids | |
| --- | --- | --- | --- | --- | --- | --- | --- | --- | --- | --- | --- | --- |
| raw | fermented | raw | fermented | Raw | fermented | raw | fermented | raw | fermented | raw | fermented |
| A | 0.00±0.0 | 0.56±0.04b | 0.08±0.00b | 0.39±0.03a | 0.07±0.00b | 0.37±0.04a | 0.08±0.01a | 0.38±0.03a | 0.03±0.00ab | 0.15±0.02b | 0.02±0.00b | 1.24±0.00c |
| B | 0.00±0.0 | 1.16±0.05c | 0.03±0.00a | 1.15±0.00c | 0.05±0.00ab | 0.59±0.02b | 0.06±0.01a | 0.47±0.02b | 0.02±0.00a | 0.09±0.00a | 0.01±0.00a | 1.41±0.00d |
| C | 0.00±0.0 | 0.47±0.05ab | 0.05±0.00a | 1.73±0.05d | 0.04±0.00a | 0.43±0.02a | 0.08±0.01a | 0.71±0.01c | 0.07±0.01c | 0.07±0.01a | 0.02±0.00b | 1.06±0.00a |
| D | 0.00±0.0 | 0.29±0.01a | 0.02±0.00a | 0.88±0.04b | 0.14±0.01c | 0.69±0.02b | 0.09±0.04a | 0.81±0.01d | 0.05±0.00bc | 0.06±0.01a | 0.02±0.00b | 1.15±0.00b |

**The data are presented as the means ± S.E.ss (n=3). Values with the same superscript letter(s) in the same column are not significantly different (P<0.05).**

**Keywords:** A= potato peels, B= sugarcane shaft, C= wheat shaft, D= maize husk

**Enzyme content (mg/ml/min) of substrates (agrowastes) before and after fermentation**

| Samples | Amylase | | Cellulase | | Protease | | Pectinase | |
| --- | --- | --- | --- | --- | --- | --- | --- | --- |
| Raw | Fermented | raw | fermented | raw | fermented | raw | fermented |
| A | 0.08±0.00d | 0.24±0.02c | 0.11±0.00d | 7.15±0.03a | 0.01±0.00a | 0.01±0.00a | 0.01±0.00b | 0.02±0.00b |
| B | 0.02±0.00c | 0.10±0.00b | 0.09±0.00c | 8.49±0.03b | 0.01±0.00a | 0.01±0.00a | 0.01±0.00b | 0.02±0.00b |
| C | 0.01±0.00b | 0.02±0.00a | 0.08±0.00b | 9.04±0.03c | 0.01±0.00a | 0.02±0.00b | 0.00±0.00a | 0.01±0.00a |
| D | 0.00±0.00a | 0.01±0.00a | 0.03±0.00a | 9.71±0.03 | 0.01±0.00a | 0.02±0.00b | 0.00±0.00a | 0.02±0.00b |

**The data are presented as the means ± S.E.ss (n=3). Values with the same superscript letter(s) in the same column are not significantly different (P<0.05).**

**Keywords:** A= potato peels, B= sugarcane shaft, C= wheat shaft, D= maize husk
